# Supplementary material
Source: Springer Nature journal article supplement (https://www.springermedizin.de/resource/supplementary/12916_2009_225_MOESM3_ESM.pdf/9599434)
Supplement: MOESM3 [file 9599434]

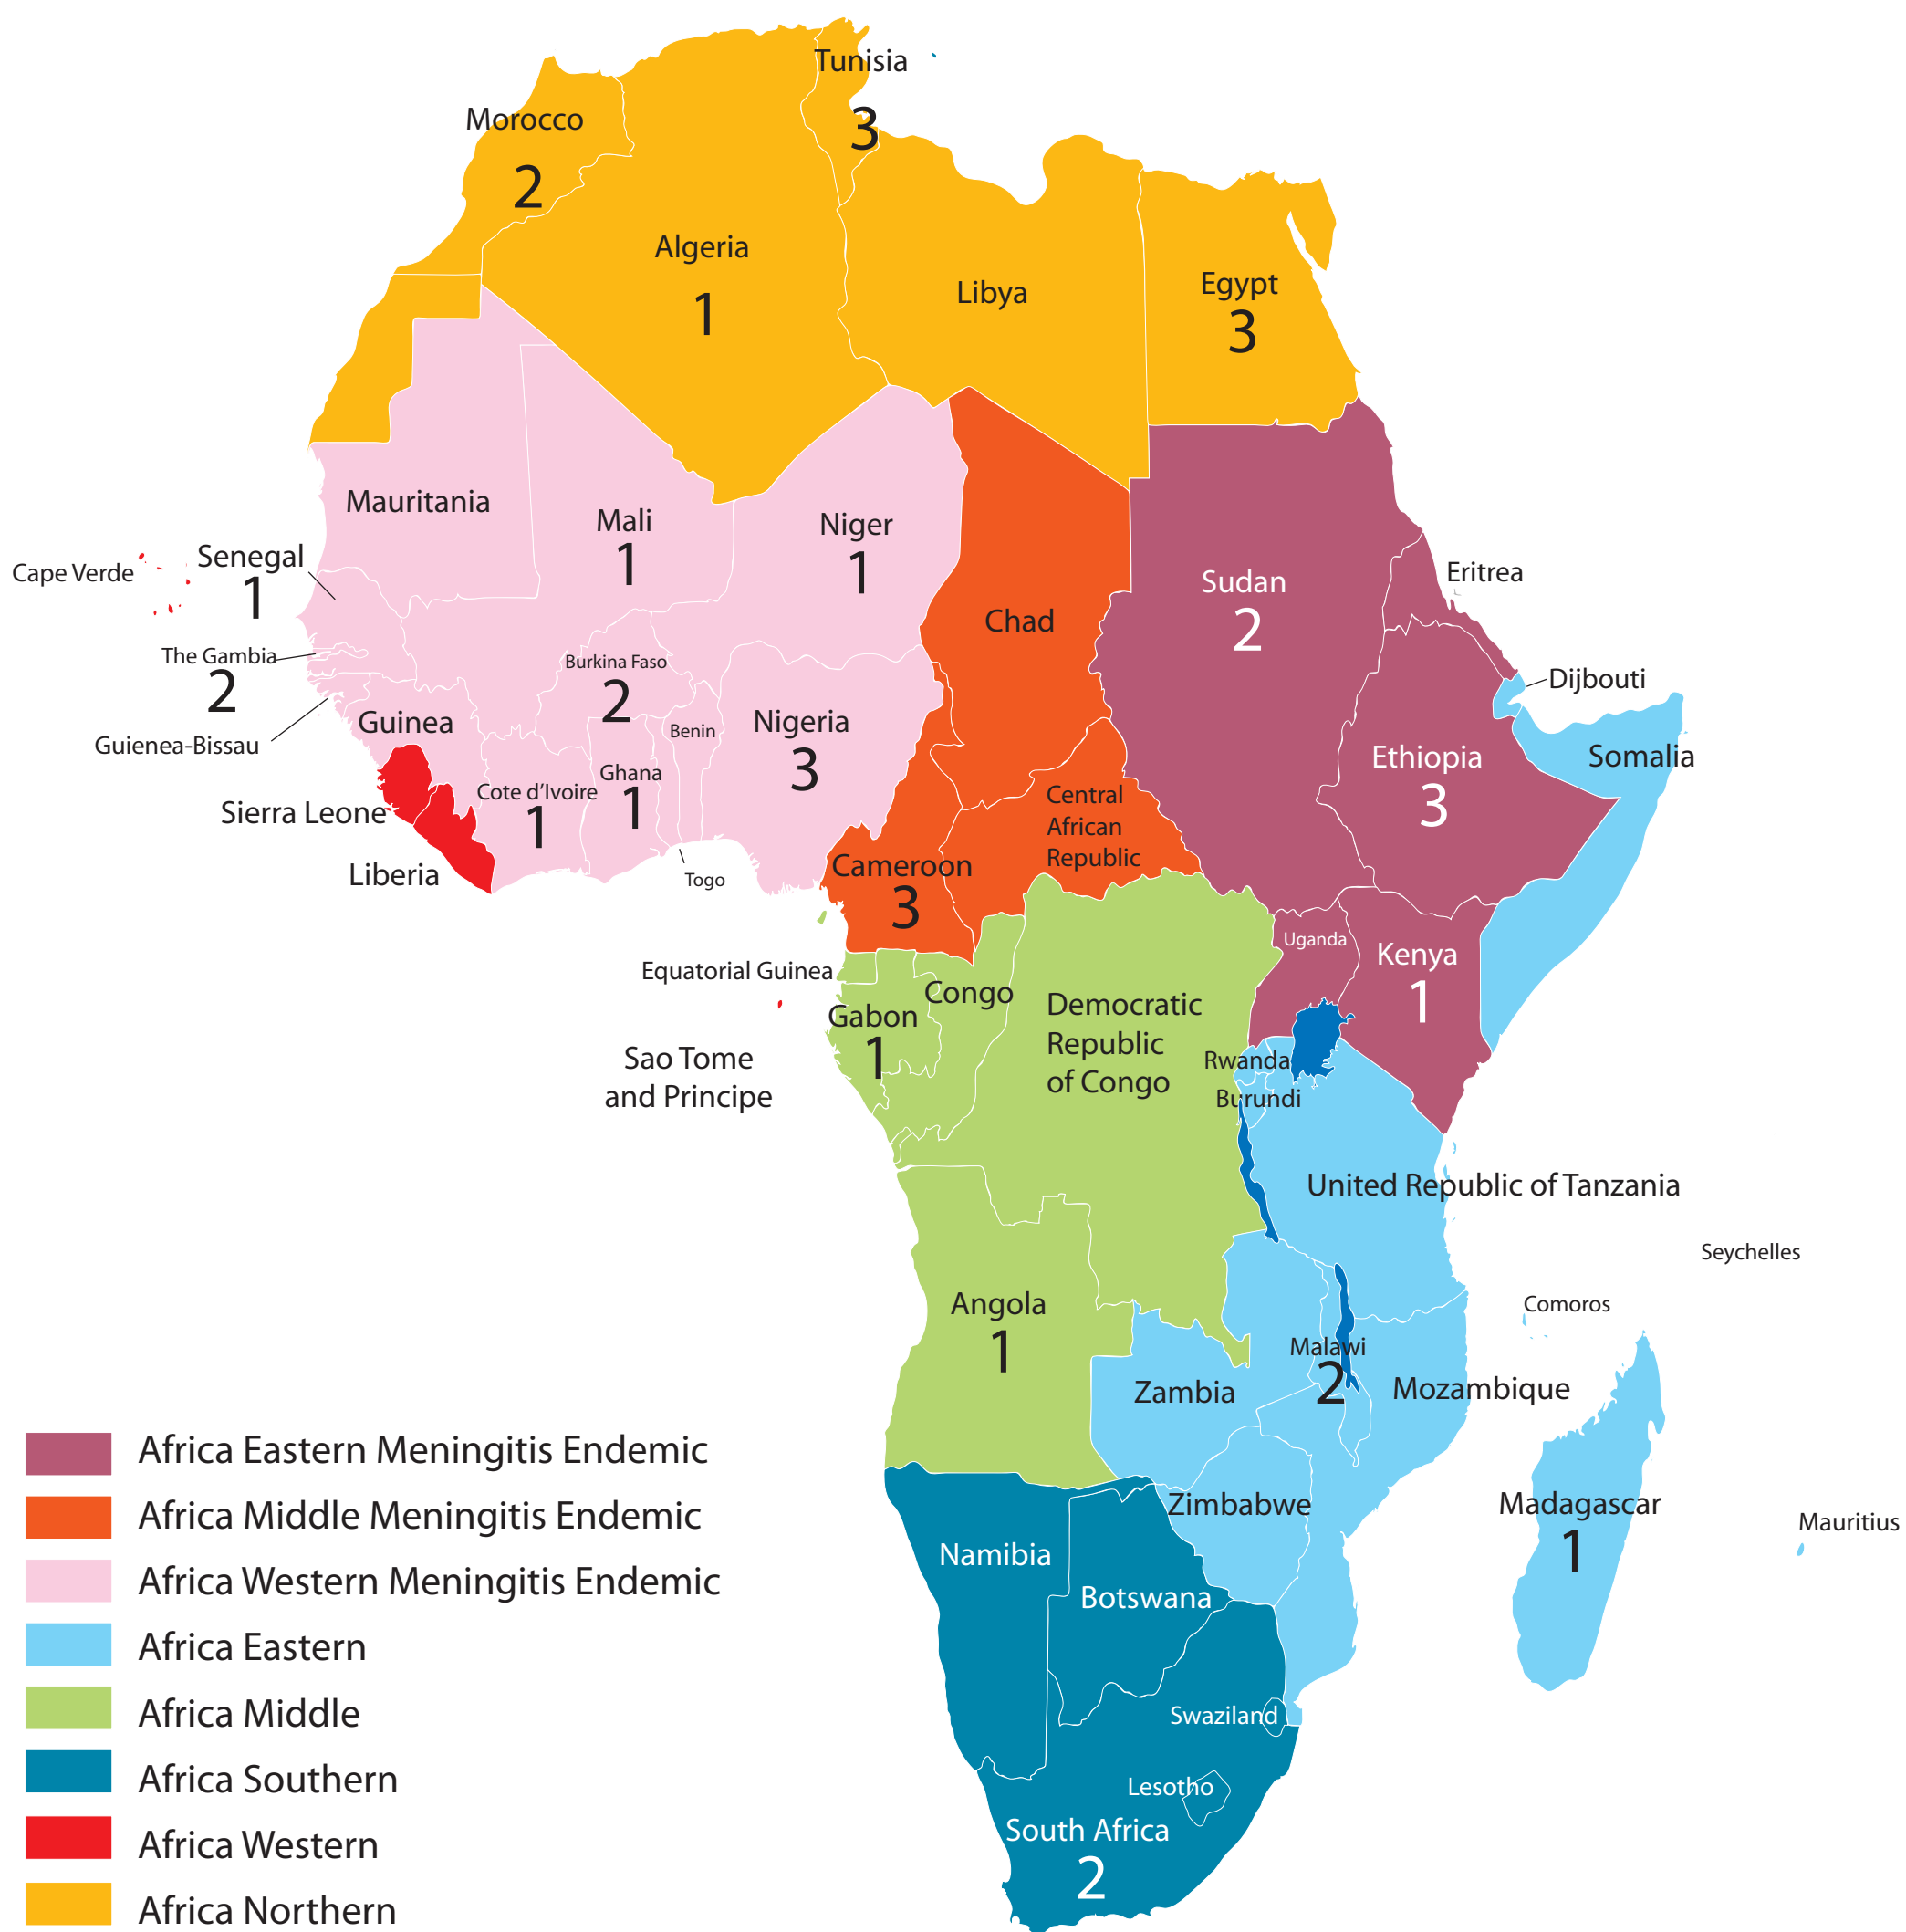

- Africa Eastern Meningitis Endemic
- Africa Middle Meningitis Endemic
- Africa Western Meningitis Endemic
- Africa Eastern
- Africa Middle
- Africa Southern
- Africa Western
- Africa Northern
